# Supplementary material
Source: Springer Nature journal article supplement (https://www.springermedizin.de/resource/supplementary/12968_2008_36_MOESM8_ESM.pdf/9577838)

**TTE****CMR****A**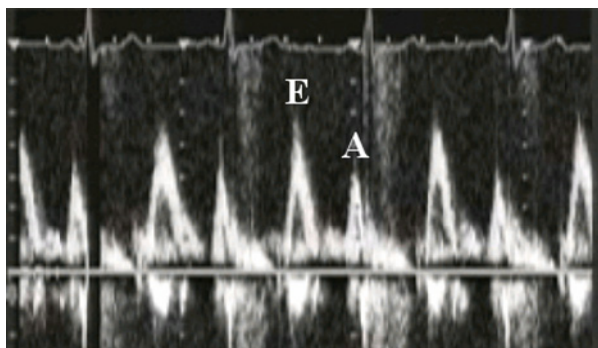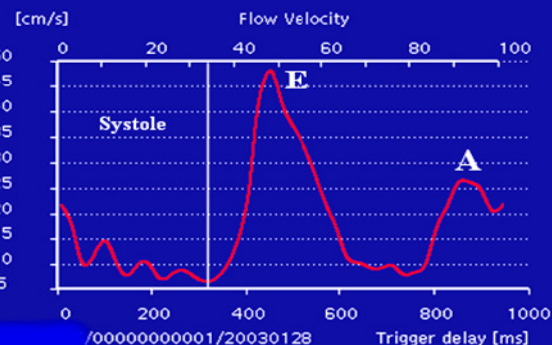**B**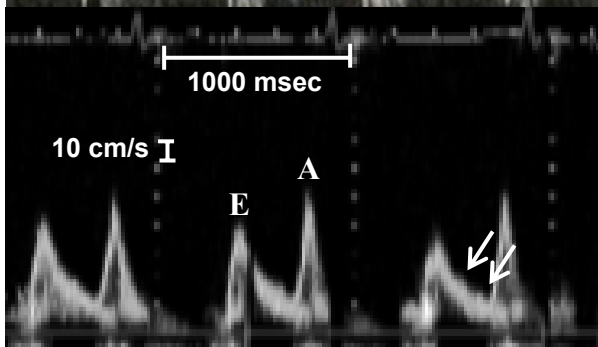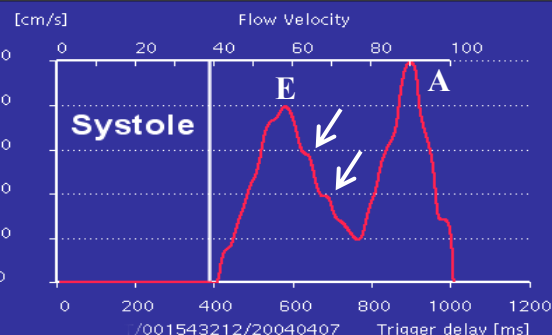**C**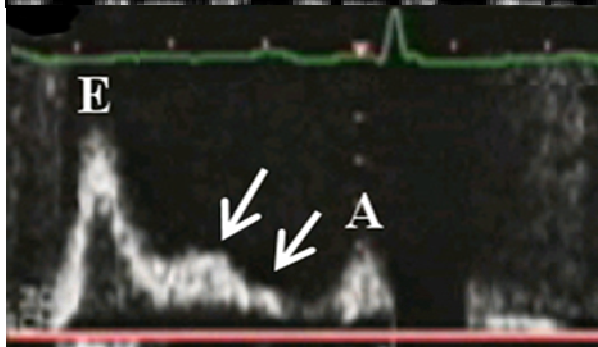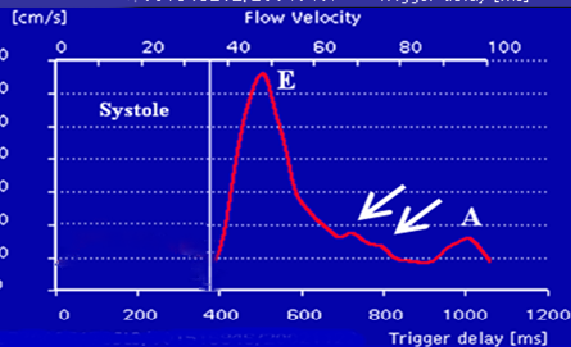**D**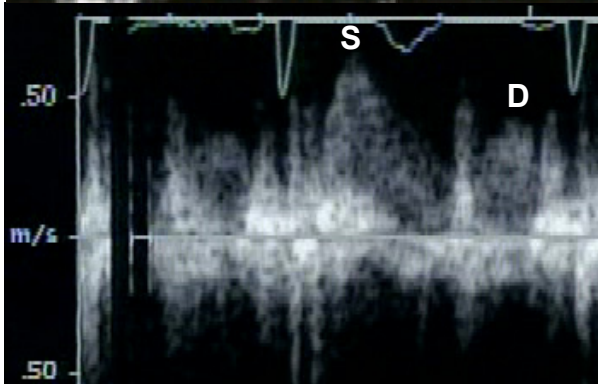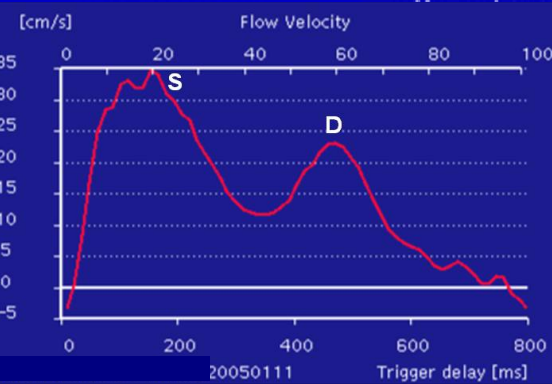

Supplement: MOESM8 [file 9577838]
